# Supplementary material for: Trends in Participation Rates for the National Cancer Screening Program in Korea, 2002-2012
Source: PubMed Central journal article supplement — Cancer Res Treat. 2016 Nov 11;49(3):798–806. doi: 10.4143/crt.2016.186 (PMC5512374; doi:10.4143/crt.2016.186), 2016-11-11
Supplement: crt-2016-186-supple1.pdf [file crt-2016-186-supple1.pdf]

**S1 Table.** The National Cancer Screening Program in Korea

| Cancer       | Target population                               | Interval (yr) | Test                                  |
|--------------|-------------------------------------------------|---------------|---------------------------------------|
| Stomach      | Aged $\geq 40$ yr                               | 2             | Upper endoscopy or UGIS <sup>a)</sup> |
| Liver        | High-risk group <sup>b)</sup> aged $\geq 40$ yr | 1             | Ultrasonography and AFP               |
| Colorectal   | Aged $\geq 50$ yr                               | 1             | FOBT <sup>c)</sup>                    |
| Breast       | Women aged $\geq 40$ yr                         | 2             | Mammography                           |
| Cervix uteri | Women aged $\geq 30$ yr                         | 2             | Pap smear                             |

UGIS, upper gastrointestinal series; AFP, alpha-fetoprotein; FOBT, fecal occult blood test.

<sup>a)</sup>In case of an abnormality on UGI, endoscopy is recommended, and a biopsy is performed when an abnormality is found during endoscopy, <sup>b)</sup>Patients at high risk for liver cancer include those with chronic hepatitis determined by serological evidence of infection with hepatitis B or C virus or liver cirrhosis, <sup>c)</sup>In case of an abnormality on FOBT, colonoscopy or a double-contrast barium enema is recommended, and a biopsy is performed when an abnormality is found during colonoscopy.
